# Supplementary material for: Prevalence of and factors associated with osteoarthritis and pain in retired Olympians compared with the general population: part 2 – the spine and upper limb
Source: HighWire-hosted journal article supplement (doi:10.1136/bjsports-2021-104978), 2022-08-12
Supplement: bjsports-2021-104978supp002_data_supplement.pdf [file bjsports-2021-104978supp002_data_supplement.pdf]

**Appendix 2. Factors associated with cervical spine OA in Olympians and general population control.**

|                      | Olympians           |                                     | Controls            |                                     |
|----------------------|---------------------|-------------------------------------|---------------------|-------------------------------------|
|                      | Prevalence<br>n (%) | aOR (95% CI)<br>adjusted a, s, b, i | Prevalence<br>n (%) | aOR (95% CI)<br>adjusted a, s, b, i |
| <b>Age</b>           |                     |                                     |                     |                                     |
| 20-39                | 6/1194 (0.50)       | 1.00 (reference)                    | 2/776 (0.26)        | 1.00 (reference)                    |
| 40-59                | 44/1359 (3.24)      | <b>6.80 (2.82 to 16.37)</b>         | 15/646 (2.32)       | <b>16.60 (2.17 to 127.2)</b>        |
| >60                  | 22/580 (3.79)       | <b>11.87 (4.59 to 30.70)</b>        | 8/212 (3.77)        | <b>29.48 (3.58 to 242.7)</b>        |
| <b>Sex</b>           |                     |                                     |                     |                                     |
| male                 | 26/1840 (1.41)      | 1.00 (reference)                    | 10/723 (1.38)       | 1.00 (reference)                    |
| female               | 50/1488 (3.36)      | <b>3.35 (1.88 to 5.99)</b>          | 15/998 (1.50)       | 1.14 (0.48 to 2.69)                 |
| <b>BMI</b>           |                     |                                     |                     |                                     |
| normal               | 41/1774 (2.31)      | 1.00 (reference)                    | 12/981 (1.22)       | 1.00 (reference)                    |
| overweight           | 24/1063 (2.26)      | 1.14 (0.63 to 2.04)                 | 7/457 (1.53)        | 1.04 (0.39 to 2.76)                 |
| obese                | 7/342 (2.05)        | 0.86 (0.34 to 2.17)                 | 5/190 (2.63)        | 1.54 (0.52 to 4.59)                 |
| <b>Cspine injury</b> |                     |                                     |                     |                                     |
| no                   | 49/3209 (1.53)      | 1.00 (reference)                    | 20/1683 (1.19)      | 1.00 (reference)                    |
| yes                  | 28/148 (18.92)      | <b>17.83 (1.02 to 31.14)</b>        | 5/52 (9.62)         | <b>11.03 (3.71 to 32.83)</b>        |
| <b>Comorbidities</b> |                     |                                     |                     |                                     |
| none                 | 34/2379 (1.43)      | 1.00 (reference)                    | 10/1263 (0.79)      | 1.00 (reference)                    |
| 1                    | 24/696 (3.45)       | <b>1.91 (1.05 to 3.48)</b>          | 10/336 (2.98)       | <b>3.62 (1.38 to 9.49)</b>          |
| 2 or more            | 19/282 (6.74)       | <b>3.90 (1.96 to 7.76)</b>          | 5/136 (3.68)        | <b>3.34 (1.01 to 11.08)</b>         |

(Values are presented as count (n) and prevalence (%). aOR adjusted a, s, b, i = odds ratio adjusted for confounders age, sex, BMI and injury. BMI = body mass index. Cspine = cervical spine. Bold denotes statistical significance.)
