# Supplementary material for: Prevalence of and factors associated with osteoarthritis and pain in retired Olympians compared with the general population: part 2 – the spine and upper limb
Source: HighWire-hosted journal article supplement (doi:10.1136/bjsports-2021-104978), 2022-08-12
Supplement: bjsports-2021-104978supp003_data_supplement.pdf [file bjsports-2021-104978supp003_data_supplement.pdf]

**Appendix 3. Factors associated with shoulder OA in Olympians and general population control.**

|                           | Olympians           |                                     | Controls            |                                     |
|---------------------------|---------------------|-------------------------------------|---------------------|-------------------------------------|
|                           | Prevalence<br>n (%) | aOR (95% CI)<br>adjusted a, s, b, i | Prevalence<br>n (%) | aOR (95% CI)<br>adjusted a, s, b, i |
| <b>Age</b>                |                     |                                     |                     |                                     |
| 20-39                     | 15/1194 (1.26)      | 1.00                                | 5/776 (0.64)        | 1.00                                |
| 40-59                     | 35/1359 (2.58)      | 1.31 (0.75 to 2.31)                 | 9/646 (1.39)        | 2.15 (0.71 to 6.48)                 |
| >60                       | 24/580 (4.14)       | 1.63 (0.85 to 3.13)                 | 7/212 (3.30)        | <b>5.55 (1.74 to 17.77)</b>         |
| <b>Sex</b>                |                     |                                     |                     |                                     |
| male                      | 44/1840 (2.39)      | 1.00                                | 11/723 (1.52)       | 1.00                                |
| female                    | 35/1488 (2.35)      | 1.30 (0.79 to 2.16)                 | 11/998 (1.10)       | 0.782 (0.33 to 1.88)                |
| <b>BMI</b>                |                     |                                     |                     |                                     |
| normal                    | 33/1774 (1.86)      | 1.00                                | 11/981 (1.12)       |                                     |
| overweight                | 30/1063 (2.82)      | 1.34 (0.77 to 2.31)                 | 7/457 (1.53)        |                                     |
| obese                     | 14/342 (4.09)       | 1.80 (0.89 to 3.65)                 | 4/190 (2.11)        |                                     |
| <b>Injury</b>             |                     |                                     |                     |                                     |
| no                        | 44/2827 (1.56)      | 1.00                                | 17/1513 (1.12)      | 1.00                                |
| yes                       | 35/530 (6.60)       | <b>4.91 (3.03 to 7.96)</b>          | 5/222 (2.25)        | 2.04 (0.73 to 5.71)                 |
| Shoulder recurrent injury | 32/259 (12.36)      | <b>5.63 (2.27 to 13.98)</b>         | 9/98 (9.18)         | <b>8.67 (1.32 to 45.14)</b>         |
| <b>Comorbidities</b>      |                     |                                     |                     |                                     |
| none                      | 27/2379 (1.13)      | 1.00                                | 8/1263 (0.63)       | 1.00                                |
| 1                         | 29/696 (4.17)       | <b>2.92 (1.64 to 5.18)</b>          | 10/336 (2.98)       | <b>3.95 (1.51 to 10.31)</b>         |
| 2 or more                 | 23/282 (8.16)       | <b>5.53 (2.95 to 10.40)</b>         | 4/136 (2.94)        | 2.60 (0.64 to 10.52)                |

(Values are presented as count (n) and prevalence (%). aOR adjusted a, s, b, i = odds ratio adjusted for confounders age, sex, BMI and injury. BMI = body mass index. Bold denotes statistical significance.)
